# Supplementary material for: The Human Cell Atlas bone marrow single-cell interactive web portal
Source: PubMed Central journal article supplement (PMC6296228; doi:10.1016/j.exphem.2018.09.004), 2018-09-21

**Figure S1**

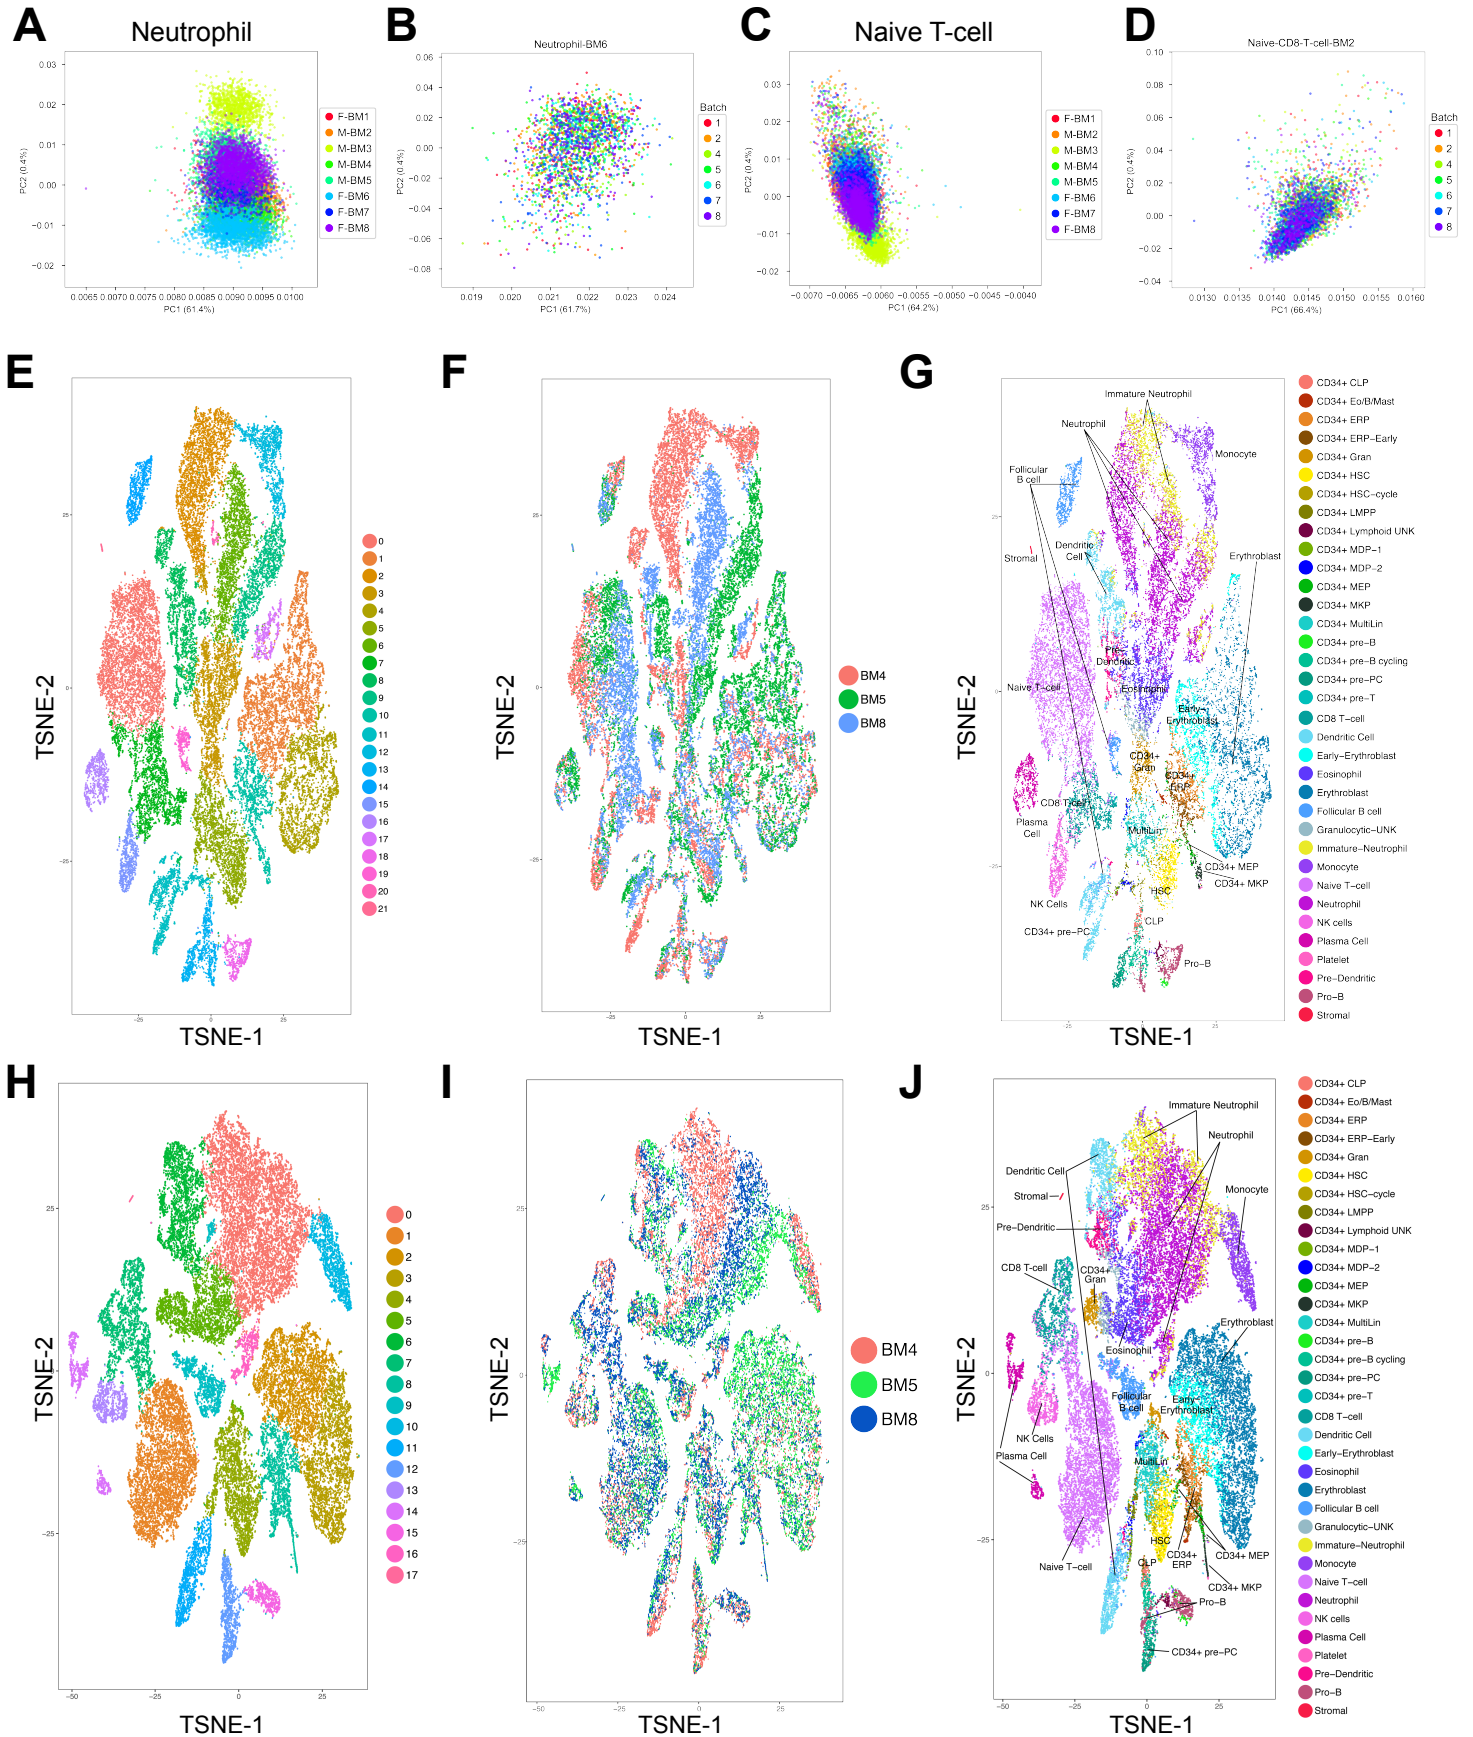

Supplement: NIHMS1510309-supplement-1.pdf [file NIHMS1510309-supplement-1.pdf]
